# Supplementary material
Source: MDPI journal article supplement (https://www.mdpi.com/2073-4441/14/17/2660)
Supplement: s1 [file s1]

Text 1

**Table S1.** The volume of inter-basin water transfer in Huangtaiqiao basin

| Year                                                                                        | 2008  | 2009  | 2010  | 2011  | 2012  | 2013  | 2014  | 2015  | 2016  | 2017  |
|---------------------------------------------------------------------------------------------|-------|-------|-------|-------|-------|-------|-------|-------|-------|-------|
| The volume<br>of inter-basin<br>water<br>transfer<br>(10 <sup>8</sup> m <sup>3</sup> /year) | 5.503 | 3.587 | 2.998 | 3.039 | 2.723 | 3.065 | 2.942 | 2.288 | 2.044 | 3.354 |

**Table S2.** The parameters of GR3 and GR3-ibwt

| Parameters | Units                                                | Physical meaning                                        | Value   |          |
|------------|------------------------------------------------------|---------------------------------------------------------|---------|----------|
|            |                                                      |                                                         | GR3     | GR3-ibwt |
| A          | mm                                                   | Maximum water depth<br>of the runoff<br>generation tank | 1335.33 | 2223.71  |
| B          | mm                                                   | Maximum water depth<br>of the runoff routing<br>tank    | 831.96  | 799.34   |
| C          | The length of time<br>period in model<br>calculation | The number of unit<br>line periods                      | 2.00    | 1.92     |

Text 2

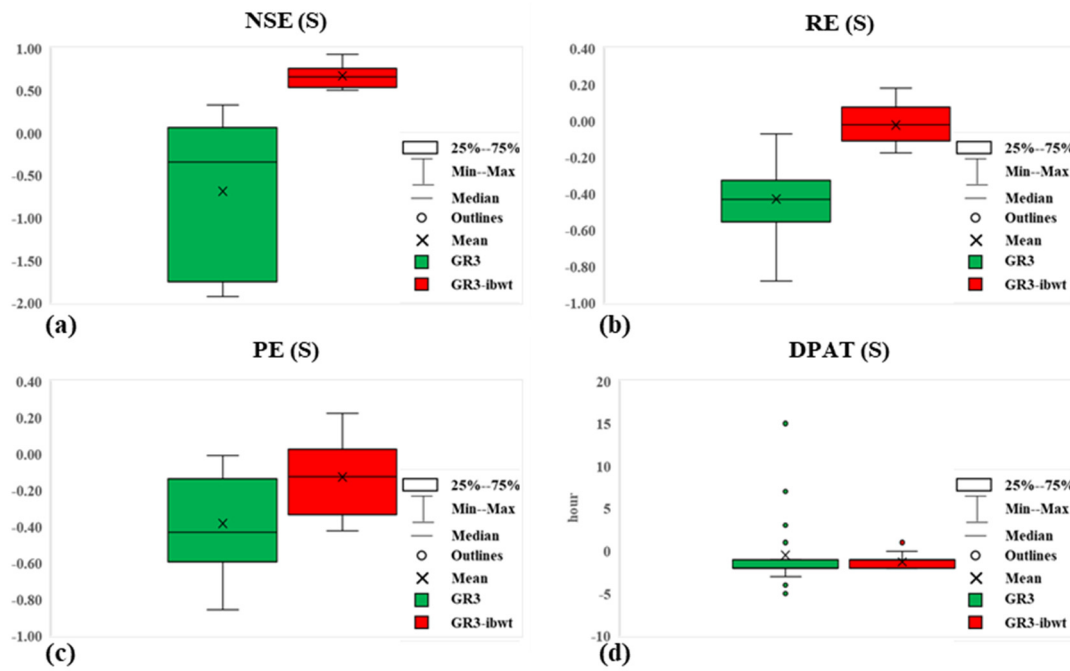

**Figure S1.** Box diagram of the measured and simulated discharge evaluation in small flood processes

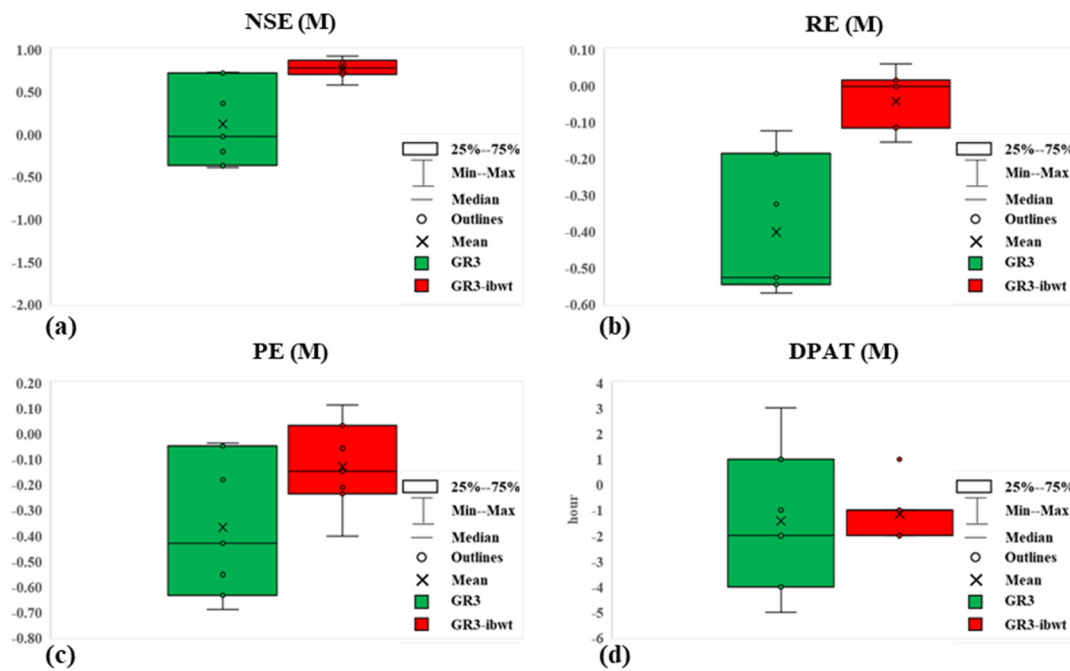

**Figure S2.** Box diagram of the measured and simulated discharge evaluation in medium flood processes

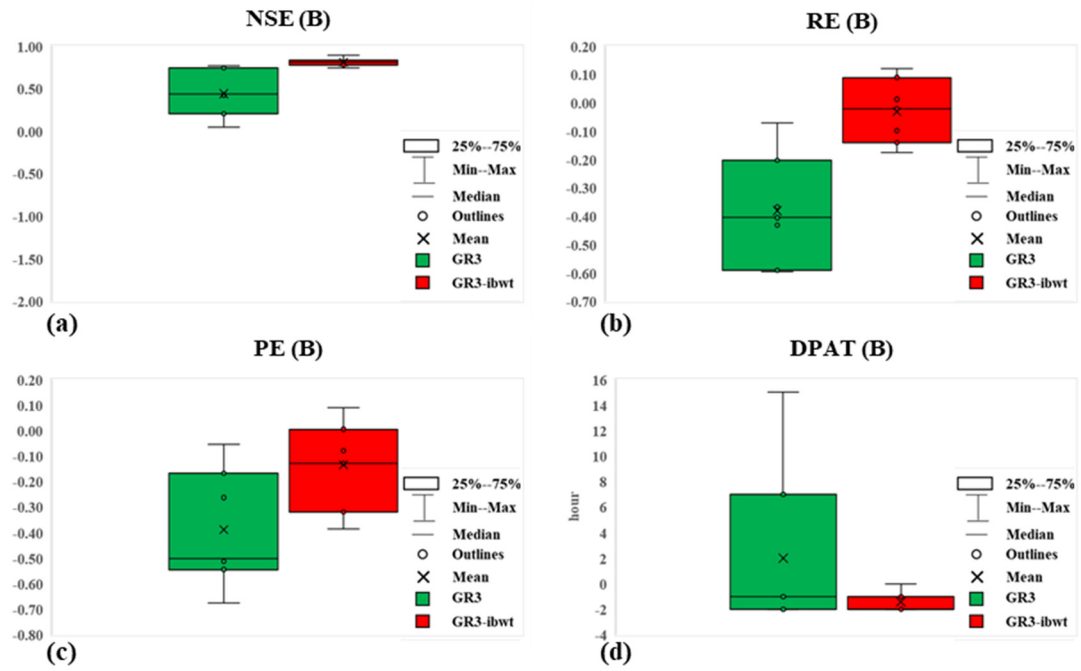

**Figure S3.** Box diagram of the measured and simulated discharge evaluation in big flood processes
